# Supplementary material for: Inverse-Designed Broadband All-Dielectric Electromagnetic Metadevices
Source: PubMed Central journal article supplement (PMC5778146; doi:10.1038/s41598-018-19796-y), 2018-01-22
Supplement: 41598_2018_19796_MOESM1_ESM.pdf [file 41598_2018_19796_MOESM1_ESM.pdf]

**Supplementary materials for:**

**Inverse-Designed Broadband All-Dielectric Electromagnetic Metadevices**

**F. Callewaert<sup>1</sup>, V. Velev<sup>2</sup>, P. Kumar<sup>1,2</sup>, A.V. Sahakian<sup>1</sup>, and K. Aydin<sup>1,\*</sup>**

*<sup>1</sup> Department of Electrical Engineering and Computer Science, Northwestern University,  
Evanston, IL 60208, USA*

*<sup>2</sup> Department of Physics and Astronomy, Northwestern University, Evanston, IL 60208, USA*

\* Correspondence and requests for materials should be addressed to K. A.  
(aydin@northwestern.edu)

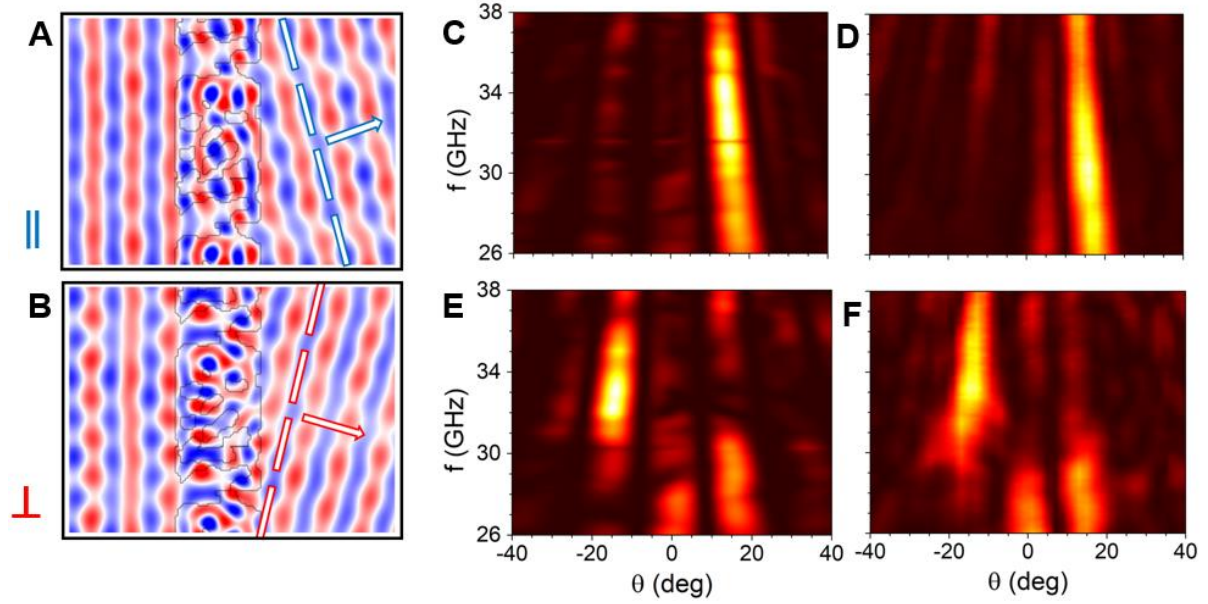

**Figure S1.** 15° polarization splitter. Simulated  $H_z$  (A) and  $E_z$  (B) fields in the 15° polarization splitter with a perpendicularly incoming plane wave for parallel (A) and perpendicular (B) polarizations and at a frequency of 33GHz. Simulated (C, E) and experimental (D, F) far-field intensity color maps as a function of the output angle between -40° and 40° and as a function of the frequency between 26GHz and 38GHz for both parallel (C, D) and perpendicular (E, F) polarizations.

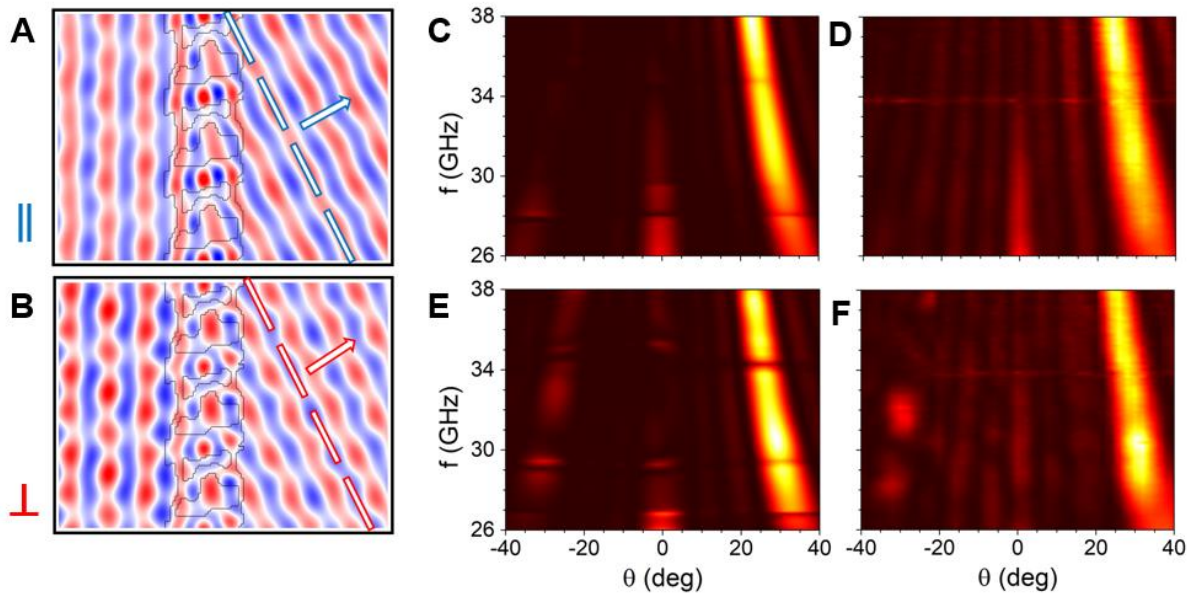

**Figure S2.** 30° bend. Simulated  $H_z$  (A) and  $E_z$  (B) fields in the 30° bending device with a perpendicularly incoming plane wave for parallel (A) and perpendicular (B) polarizations and at a frequency of 33GHz. Simulated (C, E) and experimental (D, F) far-field intensity color maps as a function of the output angle between -40° and 40° and as a function of the frequency between 26GHz and 38GHz for both parallel (C, D) and perpendicular (E, F) polarizations.

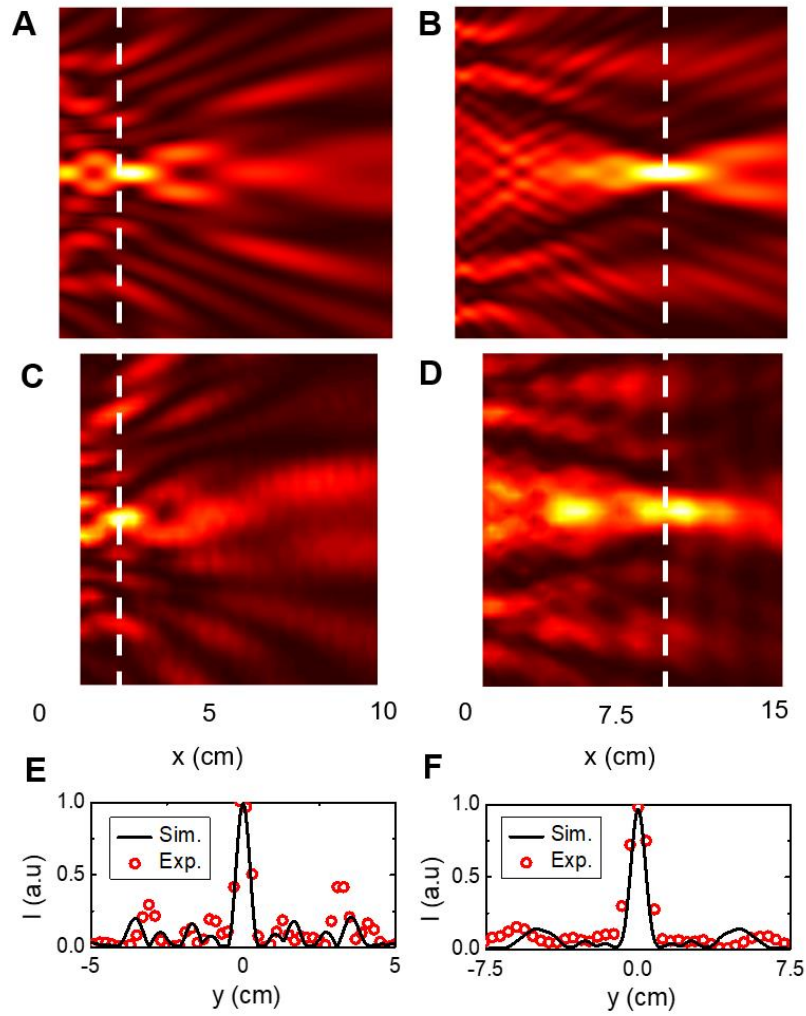

**Figure S3.** Inverse-designed metalenses at 30GHz. Simulated (A, B) and experimental (C, D) electromagnetic intensity color maps along the x-y plane at the output of the devices at a frequency of 30 GHz for the first (A, C) and second (B, D) lenses. (E) and (F): Cross-section of the simulated (black line) and measured (red circles) power along the white dashed lines on the color maps for both lenses.
